# Supplementary material for: Authentication of Polish Red Wines Produced from Zweigelt and Rondo Grape Varieties Based on Volatile Compounds Analysis in Combination with Machine Learning Algorithms: Hotrienol as a Marker of the Zweigelt Variety
Source: MDPI journal article supplement (doi:10.3390/molecules28041961), 2023-02-18
Supplement: s1 [file s1]

Table S1. Relative concentrations of volatile compounds in Zweigelt wines (µg/L).

| Compound                    | Wine    |         |        |         |         |                  |         |         |         |         |         |                  |                  |
|-----------------------------|---------|---------|--------|---------|---------|------------------|---------|---------|---------|---------|---------|------------------|------------------|
|                             | Z1      | Z2      | Z3     | Z4      | Z5      | Mean             | Z1 LAB  | Z2 LAB  | Z3 LAB  | Z4 LAB  | Z5 LAB  | Mean             | Total mean       |
| <i>Acids</i>                |         |         |        |         |         |                  |         |         |         |         |         |                  |                  |
| Acetic acid                 | 21.66   | 23.53   | 44.43  | 28.36   | 37.28   | 31.05 ± 9.51     | 57.51   | 47.54   | 53.76   | 55.66   | 63.07   | 55.51 ± 7.59     | 43.28 ± 15.04    |
| Propanoic acid              | 0.27    | 0.12    | 0.00   | 0.20    | 0.00    | 0.12 ± 0.18      | 0.00    | 0.09    | 0.22    | 0.00    | 0.23    | 0.11 ± 0.16      | 0.11 ± 0.16      |
| 2-Methylpropanoic acid      | 10.90   | 8.33    | 6.45   | 6.78    | 5.57    | 7.61 ± 6.41      | 11.63   | 5.03    | 3.21    | 7.30    | 8.81    | 7.20 ± 5.63      | 7.40 ± 5.93      |
| Hexanoic acid               | 73.44   | 63.83   | 50.29  | 77.44   | 99.79   | 72.96 ± 19.94    | 56.86   | 54.35   | 63.65   | 91.35   | 70.12   | 67.27 ± 18.04    | 70.11 ± 18.91    |
| Octanoic Acid               | 139.44  | 116.70  | 93.58  | 140.07  | 192.64  | 136.48 ± 40.17   | 103.67  | 105.98  | 116.77  | 170.83  | 120.82  | 123.61 ± 34.05   | 130.05 ± 37.17   |
| Nonanoic acid               | 0.38    | 1.03    | 0.45   | 0.97    | 0.81    | 0.73 ± 0.41      | 0.69    | 0.52    | 0.67    | 0.43    | 0.60    | 0.58 ± 0.20      | 0.66 ± 0.33      |
| Decanoic acid               | 11.22   | 9.80    | 7.28   | 18.34   | 22.41   | 13.81 ± 6.49     | 9.01    | 10.72   | 9.09    | 16.09   | 9.95    | 10.97 ± 3.69     | 12.39 ± 5.38     |
| Benzoic acid                | 0.00    | 0.00    | 0.07   | 0.40    | 0.06    | 0.11 ± 0.16      | 0.12    | 0.04    | 0.55    | 0.06    | 0.03    | 0.16 ± 0.21      | 0.13 ± 0.19      |
| Dodecanoic acid             | 0.00    | 0.08    | 0.08   | 0.28    | 0.16    | 0.12 ± 0.19      | 0.11    | 0.20    | 0.30    | 0.07    | 0.30    | 0.20 ± 0.18      | 0.16 ± 0.18      |
| Subtotal                    | 257.31  | 223.42  | 202.63 | 272.84  | 358.72  |                  | 239.60  | 224.47  | 248.22  | 341.79  | 273.93  |                  |                  |
| Proportions (%)             | 6.69    | 7.43    | 10.29  | 10.35   | 8.42    |                  | 8.47    | 9.41    | 9.52    | 12.73   | 9.07    |                  |                  |
| <i>Alcohols</i>             |         |         |        |         |         |                  |         |         |         |         |         |                  |                  |
| 2-Methylpropan-1-ol         | 183.07  | 17.55   | 104.37 | 160.00  | 157.55  | 124.51 ± 80.44   | 116.56  | 70.21   | 89.02   | 67.02   | 179.81  | 104.52 ± 54.41   | 114.52 ± 68.24   |
| Butan-1-ol                  | 3.38    | 3.20    | 0.24   | 1.15    | 5.92    | 2.78 ± 2.53      | 1.05    | 1.11    | 1.24    | 1.80    | 1.44    | 1.33 ± 1.40      | 2.05 ± 2.14      |
| 3-Methylbutan-1-ol          | 2132.56 | 1824.56 | 858.97 | 1437.50 | 2541.89 | 1759.10 ± 679.25 | 1368.19 | 1181.60 | 1260.33 | 1187.00 | 1540.52 | 1307.53 ± 435.26 | 1533.31 ± 605.75 |
| Pentan-1-ol                 | 1.07    | 0.78    | 0.66   | 0.56    | 0.92    | 0.80 ± 0.20      | 0.63    | 0.58    | 0.61    | 0.61    | 0.62    | 0.61 ± 0.09      | 0.71 ± 0.18      |
| 4-Methylpentan-1-ol         | 3.82    | 3.12    | 2.54   | 1.78    | 3.65    | 2.98 ± 0.81      | 2.05    | 2.14    | 2.43    | 2.02    | 2.29    | 2.19 ± 0.34      | 2.58 ± 0.73      |
| 3-Methylpentan-1-ol         | 5.01    | 4.27    | 3.11   | 2.59    | 4.32    | 3.86 ± 0.96      | 2.71    | 2.90    | 2.99    | 2.74    | 2.67    | 2.80 ± 0.34      | 3.33 ± 0.89      |
| Hexan-1-ol                  | 113.11  | 85.37   | 69.49  | 69.57   | 95.76   | 86.66 ± 18.47    | 63.47   | 61.10   | 65.59   | 83.37   | 62.74   | 67.25 ± 13.64    | 76.96 ± 18.76    |
| E)-3-Hexen-1-ol             | 0.00    | 0.00    | 0.34   | 0.00    | 0.00    | 0.07 ± 0.18      | 0.00    | 0.00    | 0.17    | 0.13    | 0.00    | 0.06 ± 0.16      | 0.06 ± 0.17      |
| 3-Ethoxypropan-1-ol         | 0.18    | 0.54    | 0.53   | 0.51    | 0.54    | 0.46 ± 0.15      | 0.19    | 0.55    | 0.59    | 0.49    | 0.46    | 0.46 ± 0.16      | 0.46 ± 0.15      |
| (Z)-3-Hexen-1-ol            | 0.00    | 0.07    | 0.14   | 0.12    | 0.24    | 0.11 ± 0.11      | 0.05    | 0.15    | 0.00    | 0.15    | 0.17    | 0.10 ± 0.09      | 0.11 ± 0.10      |
| Octen-3-ol                  | 0.00    | 0.00    | 0.00   | 0.00    | 1.17    | 0.23 ± 0.49      | 0.00    | 0.23    | 0.00    | 0.55    | 0.23    | 0.20 ± 0.47      | 0.22 ± 0.47      |
| Heptan-1-ol                 | 2.36    | 1.82    | 2.09   | 1.74    | 2.33    | 2.07 ± 0.34      | 1.42    | 1.72    | 2.20    | 2.91    | 1.80    | 2.01 ± 0.74      | 2.04 ± 0.56      |
| 2-Ethylhexan-1-ol           | 10.29   | 8.89    | 9.51   | 5.83    | 9.45    | 8.79 ± 2.28      | 4.21    | 5.83    | 9.72    | 8.10    | 5.49    | 6.67 ± 2.94      | 7.73 ± 2.80      |
| 3-Ethyl-4-methylpentan-1-ol | 1.83    | 1.55    | 1.04   | 0.99    | 1.63    | 1.41 ± 0.38      | 0.80    | 0.99    | 1.06    | 1.38    | 0.88    | 1.02 ± 0.33      | 1.21 ± 0.40      |
| Butane-2,3-diol             | 41.22   | 54.31   | 11.55  | 28.66   | 67.70   | 40.69 ± 28.38    | 25.80   | 39.27   | 57.67   | 30.94   | 34.60   | 37.66 ± 23.75    | 39.17 ± 25.76    |

Table S1. Cont.

| Compound                           | Wine    |         |         |         |         |                 |         |         |         |         |         |                |                 |
|------------------------------------|---------|---------|---------|---------|---------|-----------------|---------|---------|---------|---------|---------|----------------|-----------------|
|                                    | Z1      | Z2      | Z3      | Z4      | Z5      | Mean            | Z1 LAB  | Z2 LAB  | Z3 LAB  | Z4 LAB  | Z5 LAB  | Mean           | Total mean      |
| Octan-1-ol                         | 22.29   | 8.90    | 11.86   | 8.26    | 21.36   | 14.53 ± 6.91    | 12.32   | 7.60    | 12.42   | 13.11   | 14.38   | 11.96 ± 4.39   | 13.25 ± 5.84    |
| Propane-1,2-diol                   | 0.00    | 0.18    | 0.12    | 0.67    | 0.65    | 0.32 ± 0.42     | 0.20    | 0.36    | 0.46    | 0.42    | 0.38    | 0.36 ± 0.33    | 0.34 ± 0.37     |
| 2-(2-Ethoxyethoxy)-ethanol         | 2.67    | 2.47    | 1.50    | 1.79    | 3.07    | 2.30 ± 0.66     | 1.50    | 1.44    | 1.59    | 1.90    | 1.42    | 1.57 ± 0.38    | 1.94 ± 0.65     |
| Nonan-1-ol                         | 4.75    | 2.94    | 2.50    | 2.22    | 4.28    | 3.34 ± 1.50     | 2.37    | 2.04    | 2.54    | 2.83    | 2.36    | 2.43 ± 1.07    | 2.88 ± 1.36     |
| Decan-1-ol                         | 3.56    | 1.76    | 2.30    | 1.43    | 4.31    | 2.67 ± 1.70     | 2.28    | 1.41    | 2.46    | 2.20    | 2.21    | 2.11 ± 1.09    | 2.39 ± 1.43     |
| Phenylmethanol                     | 2.69    | 1.13    | 0.22    | 0.99    | 0.24    | 1.05 ± 0.96     | 0.75    | 0.25    | 0.16    | 0.25    | 0.14    | 0.31 ± 0.24    | 0.68 ± 0.78     |
| 2-Phenylethanol                    | 480.42  | 328.89  | 240.62  | 369.96  | 484.11  | 380.80 ± 110.00 | 419.99  | 294.15  | 326.85  | 405.73  | 354.08  | 360.16 ± 80.15 | 370.48 ± 95.14  |
| Dodecan-1-ol                       | 2.52    | 2.47    | 1.32    | 1.69    | 1.65    | 1.93 ± 0.95     | 0.62    | 0.88    | 1.24    | 1.39    | 0.75    | 0.98 ± 0.58    | 1.45 ± 0.91     |
| Hexadecan-1-ol                     | 0.45    | 0.19    | 0.30    | 0.53    | 0.00    | 0.29 ± 0.21     | 0.00    | 0.19    | 0.00    | 0.39    | 0.00    | 0.12 ± 0.18    | 0.21 ± 0.21     |
| Subtotal                           | 3017.25 | 2354.96 | 1325.32 | 2098.54 | 3412.74 |                 | 2027.16 | 1676.70 | 1841.34 | 1817.43 | 2209.44 |                |                 |
| Proportions (%)                    | 78.39   | 78.36   | 67.28   | 79.63   | 80.10   |                 | 71.70   | 70.26   | 70.63   | 67.70   | 73.16   |                |                 |
| <i>Aldehydes</i>                   |         |         |         |         |         |                 |         |         |         |         |         |                |                 |
| Benzaldehyde                       | 0.00    | 0.00    | 13.81   | 0.11    | 14.58   | 5.70 ± 7.24     | 6.80    | 6.70    | 3.69    | 7.59    | 10.44   | 7.04 ± 2.42    | 6.37 ± 5.35     |
| 4-Methylbenzaldehyde               | 0.80    | 0.60    | 0.48    | 0.77    | 0.68    | 0.67 ± 0.14     | 0.30    | 0.43    | 0.31    | 0.69    | 0.45    | 0.44 ± 0.17    | 0.55 ± 0.19     |
| Subtotal                           | 0.80    | 0.60    | 14.29   | 0.88    | 15.26   |                 | 7.10    | 7.13    | 4.00    | 8.28    | 10.89   |                |                 |
| Proportions (%)                    | 0.02    | 0.02    | 0.73    | 0.03    | 0.36    |                 | 0.25    | 0.30    | 0.15    | 0.31    | 0.36    |                |                 |
| <i>Esters</i>                      |         |         |         |         |         |                 |         |         |         |         |         |                |                 |
| Ethyl 3-methylbutanoate            | 2.00    | 0.45    | 0.64    | 0.83    | 1.51    | 1.09 ± 0.68     | 0.96    | 0.72    | 0.60    | 0.42    | 1.04    | 0.75 ± 0.28    | 0.92 ± 0.54     |
| Ethyl 2-hydroxypropanoate          | 87.24   | 107.41  | 202.62  | 41.48   | 85.73   | 104.90 ± 58.13  | 295.83  | 286.35  | 252.23  | 247.97  | 286.39  | 273.75 ± 47.80 | 189.32 ± 100.54 |
| Methyl octanoate                   | 0.61    | 0.41    | 0.14    | 0.50    | 0.09    | 0.35 ± 0.37     | 0.14    | 0.06    | 0.05    | 0.00    | 0.07    | 0.07 ± 0.13    | 0.21 ± 0.30     |
| Ethyl octanoate                    | 139.24  | 96.59   | 54.54   | 79.72   | 110.60  | 96.14 ± 42.11   | 79.58   | 33.64   | 65.23   | 120.55  | 66.30   | 73.06 ± 54.06  | 84.60 ± 49.04   |
| 2-Methylpropyl 2-hydroxypropanoate | 0.44    | 0.34    | 0.78    | 0.22    | 0.50    | 0.45 ± 0.21     | 1.14    | 0.70    | 0.90    | 1.21    | 1.27    | 1.04 ± 0.28    | 0.75 ± 0.39     |
| Ethyl nonanoate                    | 0.58    | 0.46    | 0.23    | 0.31    | 0.33    | 0.38 ± 0.18     | 0.34    | 0.14    | 0.19    | 0.32    | 0.10    | 0.22 ± 0.18    | 0.30 ± 0.19     |
| 3-Methylbutyl 2-hydroxypropanoate  | 3.02    | 3.29    | 5.07    | 1.18    | 3.60    | 3.23 ± 1.36     | 7.64    | 7.79    | 6.90    | 8.89    | 9.52    | 8.15 ± 1.70    | 5.69 ± 2.92     |
| Ethyl decanoate                    | 13.79   | 10.23   | 10.32   | 12.22   | 17.84   | 12.88 ± 9.87    | 10.90   | 6.85    | 6.76    | 16.11   | 7.85    | 9.69 ± 10.03   | 11.29 ± 9.91    |
| Ethyl benzoate                     | 0.18    | 0.35    | 0.07    | 0.12    | 0.22    | 0.19 ± 0.13     | 0.09    | 0.09    | 0.28    | 0.15    | 0.05    | 0.13 ± 0.12    | 0.16 ± 0.13     |
| Diethyl butanedioate               | 124.99  | 94.88   | 64.73   | 40.62   | 106.28  | 86.30 ± 34.92   | 69.41   | 58.89   | 69.00   | 47.44   | 64.25   | 61.80 ± 13.32  | 74.05 ± 28.80   |
| Ethyl 9-decenoate                  | 1.32    | 0.64    | 1.91    | 0.54    | 1.34    | 1.15 ± 0.92     | 0.61    | 0.33    | 1.52    | 0.53    | 0.64    | 0.73 ± 0.63    | 0.94 ± 0.81     |

Table S1. Cont.

| Compound                      | Wine   |        |        |        |        | Mean           | Z1 LAB | Z2 LAB | Z3 LAB | Z4 LAB | Z5 LAB | Mean          | Total mean    |
|-------------------------------|--------|--------|--------|--------|--------|----------------|--------|--------|--------|--------|--------|---------------|---------------|
|                               | Z1     | Z2     | Z3     | Z4     | Z5     |                |        |        |        |        |        |               |               |
| Methyl 2-hydroxy benzoate     | 0.17   | 0.12   | 0.16   | 0.09   | 0.14   | 0.14 ± 0.03    | 0.16   | 0.12   | 0.14   | 0.08   | 0.12   | 0.12 ± 0.04   | 0.13 ± 0.04   |
| Ethyl phenylacetate           | 2.19   | 1.74   | 0.90   | 1.27   | 2.38   | 1.70 ± 0.60    | 1.10   | 1.14   | 0.94   | 1.44   | 1.34   | 1.19 ± 0.28   | 1.45 ± 0.53   |
| 2-Phenylethyl acetate         | 0.00   | 0.00   | 0.00   | 0.62   | 0.00   | 0.12 ± 0.48    | 4.05   | 2.97   | 0.00   | 0.00   | 3.58   | 2.12 ± 1.85   | 1.12 ± 1.67   |
| Ethyl dodecanoate             | 0.00   | 0.33   | 0.00   | 0.23   | 0.52   | 0.22 ± 0.48    | 0.42   | 0.05   | 0.00   | 0.03   | 0.13   | 0.12 ± 0.19   | 0.17 ± 0.36   |
| Ethyl 3-phenylpropanoate      | 0.46   | 0.37   | 0.74   | 0.65   | 2.45   | 0.93 ± 0.82    | 0.30   | 0.30   | 0.87   | 0.91   | 1.55   | 0.79 ± 0.52   | 0.86 ± 0.68   |
| Diethyl-2-hydroxybutanedioate | 0.35   | 0.22   | 0.00   | 0.28   | 0.42   | 0.25 ± 0.15    | 0.00   | 0.00   | 0.03   | 0.03   | 0.02   | 0.01 ± 0.03   | 0.13 ± 0.16   |
| Methyl hexadecanoate          | 0.10   | 0.23   | 0.07   | 0.39   | 0.00   | 0.16 ± 0.23    | 0.12   | 0.00   | 0.06   | 0.00   | 0.00   | 0.04 ± 0.08   | 0.10 ± 0.18   |
| Ethyl hexadecanoate           | 0.20   | 0.22   | 0.13   | 0.04   | 0.38   | 0.20 ± 0.13    | 0.10   | 0.15   | 0.06   | 0.12   | 0.14   | 0.11 ± 0.08   | 0.16 ± 0.12   |
| Subtotal                      | 376.88 | 318.28 | 343.05 | 181.31 | 334.33 |                | 472.89 | 400.29 | 405.76 | 446.2  | 444.36 |               |               |
| Proportions (%)               | 9.79   | 10.59  | 17.42  | 6.88   | 7.85   |                | 16.73  | 16.77  | 15.56  | 16.62  | 14.71  |               |               |
| <b>Furan compounds</b>        |        |        |        |        |        |                |        |        |        |        |        |               |               |
| Ethyl 2-furoate               | 0.71   | 0.55   | 0.37   | 0.36   | 0.64   | 0.53 ± 0.16    | 0.32   | 0.29   | 0.32   | 0.33   | 0.32   | 0.32 ± 0.05   | 0.42 ± 0.16   |
| Dihydrofuran-2(3H)-one        | 0.00   | 0.00   | 0.00   | 0.59   | 0.00   | 0.12 ± 0.46    | 0.95   | 0.57   | 0.88   | 1.28   | 0.85   | 0.91 ± 1.18   | 0.51 ± 0.97   |
| Subtotal                      | 0.71   | 0.55   | 0.37   | 0.95   | 0.64   |                | 1.27   | 0.86   | 1.2    | 1.61   | 1.17   |               |               |
| Proportions (%)               | 0.02   | 0.02   | 0.02   | 0.04   | 0.02   |                | 0.04   | 0.04   | 0.05   | 0.06   | 0.04   |               |               |
| <b>Ketones</b>                |        |        |        |        |        |                |        |        |        |        |        |               |               |
| 4-Methyl-3-penten-2-one       | 139.07 | 100.30 | 78.26  | 75.05  | 130.17 | 104.57 ± 56.43 | 74.99  | 72.83  | 99.53  | 61.88  | 75.33  | 76.91 ± 33.24 | 90.74 ± 47.63 |
| 3-Hydroxybutan-2-one          | 0.25   | 0.41   | 0.37   | 0.27   | 0.40   | 0.34 ± 0.13    | 0.55   | 0.24   | 0.60   | 0.37   | 0.32   | 0.42 ± 0.16   | 0.38 ± 0.15   |
| Subtotal                      | 139.32 | 100.71 | 78.63  | 75.32  | 130.57 |                | 75.54  | 73.07  | 100.13 | 62.25  | 75.65  |               |               |
| Proportions (%)               | 3.62   | 3.35   | 3.99   | 2.86   | 3.06   |                | 2.67   | 3.06   | 3.84   | 2.32   | 2.51   |               |               |
| <b>Sulphur compounds</b>      |        |        |        |        |        |                |        |        |        |        |        |               |               |
| 3-(Methylsulfanyl)propan-1-ol | 1.46   | 0.67   | 0.85   | 1.23   | 1.33   | 1.11 ± 0.33    | 1.63   | 0.66   | 1.10   | 1.27   | 0.93   | 1.12 ± 0.38   | 1.11 ± 0.35   |
| Subtotal                      | 1.46   | 0.67   | 0.85   | 1.23   | 1.33   |                | 1.63   | 0.66   | 1.10   | 1.27   | 0.93   |               |               |
| Proportions (%)               | 0.04   | 0.02   | 0.04   | 0.05   | 0.03   |                | 0.06   | 0.03   | 0.04   | 0.05   | 0.03   |               |               |
| <b>Terpenes</b>               |        |        |        |        |        |                |        |        |        |        |        |               |               |
| (Z)-Linalool oxide            | 0.33   | 0.24   | 0.17   | 0.18   | 0.24   | 0.23 ± 0.19    | 0.06   | 0.20   | 0.26   | 0.19   | 0.18   | 0.18 ± 0.14   | 0.20 ± 0.16   |

Table S1. Cont.

| Compound                                                                                      | Wine    |         |         |         |         |                  |         |         |         |         |         |                 |                  |
|-----------------------------------------------------------------------------------------------|---------|---------|---------|---------|---------|------------------|---------|---------|---------|---------|---------|-----------------|------------------|
|                                                                                               | Z1      | Z2      | Z3      | Z4      | Z5      | Mean             | Z1 LAB  | Z2 LAB  | Z3 LAB  | Z4 LAB  | Z5 LAB  | Mean            | Total mean       |
| 3,7-Dimethyl-1,6-octadien-3-ol ( $\beta$ -Linalol)                                            | 0.13    | 0.14    | 0.20    | 0.11    | 0.18    | 0.15 $\pm$ 0.23  | 0.14    | 0.13    | 0.09    | 0.24    | 0.12    | 0.14 $\pm$ 0.22 | 0.15 $\pm$ 0.22  |
| 3,7-Dimethyl-1,5,7-octatrien-3-ol (Hotrienol)                                                 | 0.67    | 0.54    | 0.59    | 0.47    | 0.82    | 0.62 $\pm$ 0.36  | 0.52    | 0.50    | 0.53    | 0.79    | 0.58    | 0.58 $\pm$ 0.30 | 0.60 $\pm$ 0.33  |
| 3-Cyclohexene-1-methanol, alpha,alpha,4-trimethyl- ( $\alpha$ -Terpineol)                     | 0.61    | 0.49    | 0.56    | 0.31    | 0.63    | 0.52 $\pm$ 0.28  | 0.39    | 0.34    | 0.47    | 0.55    | 0.28    | 0.41 $\pm$ 0.32 | 0.46 $\pm$ 0.30  |
| 1,1,6-Trimethyl-1,2-dihydronaphthalene (TDN)                                                  | 1.45    | 1.91    | 0.98    | 1.18    | 2.25    | 1.55 $\pm$ 1.07  | 0.72    | 0.73    | 2.04    | 0.91    | 1.07    | 1.09 $\pm$ 0.77 | 1.32 $\pm$ 0.94  |
| ( <i>E</i> )-1-(2,6,6-trimethyl-1,3-cyclohexadien-1-yl)-2-buten-1-one ( $\beta$ -Damascenone) | 2.70    | 2.23    | 1.44    | 1.61    | 2.96    | 2.19 $\pm$ 0.72  | 0.00    | 0.95    | 1.71    | 2.13    | 0.95    | 1.15 $\pm$ 0.94 | 1.67 $\pm$ 0.98  |
| ( <i>E</i> )-6,10-dimethyl-5,9-Undecadien-2-one (Geranylacetone)                              | 47.31   | 0.00    | 0.00    | 0.00    | 0.00    | 9.46 $\pm$ 26.17 | 0.00    | 0.00    | 0.00    | 0.00    | 0.00    | 0.00 $\pm$ 0.00 | 4.73 $\pm$ 18.81 |
| ( <i>E,E</i> )-3,7,11-trimethyl-2,6,10-Dodecatrien-1-ol (( <i>E,E</i> )-Farnesol)             | 1.85    | 0.58    | 0.73    | 0.34    | 0.12    | 0.72 $\pm$ 0.69  | 0.16    | 0.43    | 0.31    | 0.74    | 0.29    | 0.38 $\pm$ 0.29 | 0.55 $\pm$ 0.55  |
| Subtotal                                                                                      | 55.05   | 6.13    | 4.67    | 4.20    | 7.20    |                  | 1.99    | 3.28    | 5.41    | 5.55    | 3.47    |                 |                  |
| Proportions (%)                                                                               | 1.43    | 0.20    | 0.24    | 0.16    | 0.17    |                  | 0.07    | 0.14    | 0.21    | 0.21    | 0.11    |                 |                  |
| Total                                                                                         | 3848.78 | 3005.32 | 1969.81 | 2635.27 | 4260.79 |                  | 2827.18 | 2386.46 | 2607.16 | 2684.38 | 3019.84 |                 |                  |

Z1-Z5 - Zweigelt wines, in which AF was induced using various yeast strains, and the wines were left to undergo spontaneous MLF; Z1 LAB-Z5 LAB – Zweigelt wines, in which AF was induced using various yeast strains (but the same strains as in Z1-Z5 wines), and MLF was carried out by inoculation with lactic acid bacteria

Table S2. Relative concentrations of volatile compounds in Rondo wines (µg/L).

| Compound                    | Wine    |         |         |         |         | Mean             | R1 LAB  | R2 LAB  | R3 LAB | R4 LAB  | R5 LAB  | Mean             | Total mean       |
|-----------------------------|---------|---------|---------|---------|---------|------------------|---------|---------|--------|---------|---------|------------------|------------------|
|                             | R1      | R2      | R3      | R4      | R5      |                  |         |         |        |         |         |                  |                  |
| <i>Acids</i>                |         |         |         |         |         |                  |         |         |        |         |         |                  |                  |
| Acetic acid                 | 25.07   | 36.03   | 32.62   | 34.92   | 54.87   | 36.71 ± 12.01    | 79.84   | 102.56  | 101.98 | 106.36  | 94.52   | 97.05 ± 16.15    | 66.88 ± 33.72    |
| Propanoic acid              | 0.12    | 0.00    | 0.30    | 0.19    | 0.00    | 0.12 ± 0.19      | 0.33    | 0.00    | 0.00   | 0.17    | 0.00    | 0.10 ± 0.15      | 0.11 ± 0.17      |
| 2-Methylpropanoic acid      | 0.00    | 0.00    | 10.00   | 9.01    | 8.90    | 5.58 ± 8.71      | 9.48    | 8.06    | 4.68   | 4.68    | 14.22   | 8.22 ± 8.43      | 6.90 ± 8.53      |
| Hexanoic acid               | 33.57   | 29.73   | 61.68   | 48.43   | 53.48   | 45.38 ± 14.03    | 39.40   | 28.29   | 37.58  | 37.88   | 39.02   | 36.43 ± 6.58     | 40.91 ± 11.69    |
| Octanoic acid               | 60.92   | 58.66   | 126.06  | 107.56  | 112.88  | 93.21 ± 35.66    | 77.08   | 56.15   | 73.04  | 78.49   | 74.87   | 71.93 ± 14.48    | 82.57 ± 28.85    |
| Nonanoic acid               | 0.75    | 0.43    | 1.03    | 1.02    | 1.45    | 0.94 ± 0.43      | 1.19    | 0.74    | 0.77   | 0.65    | 0.77    | 0.82 ± 0.36      | 0.88 ± 0.40      |
| Decanoic acid               | 9.11    | 11.86   | 16.75   | 17.55   | 17.24   | 14.50 ± 5.07     | 11.47   | 7.57    | 7.97   | 8.94    | 6.64    | 8.52 ± 2.75      | 11.51 ± 5.03     |
| Benzoic acid                | 0.15    | 0.16    | 0.16    | 0.14    | 0.19    | 0.16 ± 0.05      | 0.15    | 0.14    | 0.23   | 0.06    | 0.09    | 0.13 ± 0.08      | 0.15 ± 0.07      |
| Dodecanoic acid             | 0.33    | 0.14    | 0.61    | 0.47    | 1.03    | 0.51 ± 0.42      | 0.23    | 0.00    | 0.00   | 0.28    | 0.00    | 0.10 ± 0.24      | 0.31 ± 0.39      |
| Subtotal                    | 130.02  | 137.01  | 249.21  | 219.29  | 250.04  |                  | 219.17  | 203.51  | 226.25 | 237.51  | 230.13  |                  |                  |
| Proportions (%)             | 4.29    | 6.87    | 6.62    | 9.24    | 6.50    |                  | 6.79    | 7.19    | 11.39  | 6.34    | 7.19    |                  |                  |
| <i>Alcohols</i>             |         |         |         |         |         |                  |         |         |        |         |         |                  |                  |
| 2-Methylpropan-1-ol         | 116.86  | 127.81  | 302.81  | 112.29  | 311.17  | 194.19 ± 138.66  | 204.20  | 62.30   | 96.60  | 207.85  | 245.60  | 163.31 ± 140.27  | 178.75 ± 137.94  |
| Butan-1-ol                  | 2.88    | 1.35    | 3.60    | 0.49    | 3.67    | 2.40 ± 2.00      | 4.55    | 0.45    | 0.00   | 1.30    | 0.49    | 1.36 ± 1.95      | 1.88 ± 2.01      |
| 3-Methylbutan-1-ol          | 1873.26 | 1226.39 | 2228.80 | 1553.77 | 2306.31 | 1837.71 ± 573.99 | 1658.73 | 1522.54 | 784.94 | 2052.41 | 1706.13 | 1544.95 ± 584.30 | 1691.33 ± 588.25 |
| Pentan-1-ol                 | 0.36    | 0.45    | 0.66    | 0.26    | 0.59    | 0.46 ± 0.22      | 0.30    | 0.44    | 0.22   | 0.55    | 0.52    | 0.41 ± 0.20      | 0.43 ± 0.21      |
| 4-Methylpentan-1-ol         | 2.25    | 1.65    | 2.29    | 0.68    | 1.74    | 1.72 ± 0.71      | 2.22    | 1.25    | 1.08   | 1.26    | 1.22    | 1.41 ± 0.50      | 1.56 ± 0.62      |
| 3-Methylpentan-1-ol         | 4.02    | 2.79    | 4.03    | 1.98    | 2.02    | 2.96 ± 1.07      | 3.55    | 2.01    | 1.87   | 2.87    | 1.53    | 2.37 ± 0.90      | 2.67 ± 1.02      |
| Hexan-1-ol                  | 54.40   | 46.72   | 73.94   | 47.66   | 62.30   | 57.00 ± 15.28    | 60.22   | 46.47   | 40.47  | 72.23   | 51.45   | 54.17 ± 15.52    | 55.59 ± 15.20    |
| E)-3-Hexen-1-ol             | 0.18    | 0.00    | 0.00    | 0.00    | 0.00    | 0.04 ± 0.14      | 0.00    | 0.15    | 0.26   | 0.00    | 0.00    | 0.08 ± 0.17      | 0.06 ± 0.15      |
| 3-Ethoxypropan-1-ol         | 0.17    | 0.50    | 0.58    | 0.22    | 0.36    | 0.37 ± 0.17      | 0.16    | 0.40    | 0.49   | 0.29    | 0.30    | 0.33 ± 0.12      | 0.35 ± 0.15      |
| (Z)-3-Hexen-1-ol            | 0.09    | 0.09    | 0.30    | 0.00    | 0.13    | 0.12 ± 0.12      | 0.23    | 0.15    | 0.08   | 0.34    | 0.17    | 0.19 ± 0.13      | 0.16 ± 0.13      |
| Octen-3-ol                  | 1.21    | 1.25    | 1.72    | 1.17    | 1.71    | 1.41 ± 0.47      | 1.51    | 1.01    | 0.82   | 1.67    | 0.47    | 1.09 ± 0.68      | 1.25 ± 0.60      |
| Heptan-1-ol                 | 1.24    | 1.12    | 2.22    | 1.17    | 1.61    | 1.47 ± 0.56      | 1.63    | 1.09    | 1.21   | 1.99    | 1.14    | 1.41 ± 0.53      | 1.44 ± 0.54      |
| 2-Ethylhexan-1-ol           | 10.03   | 6.44    | 10.68   | 3.32    | 11.39   | 8.37 ± 4.11      | 10.57   | 4.34    | 2.30   | 3.85    | 6.64    | 5.54 ± 3.91      | 6.96 ± 4.20      |
| 3-Ethyl-4-methylpentan-1-ol | 0.23    | 0.24    | 0.16    | 0.21    | 0.08    | 0.18 ± 0.10      | 0.24    | 0.16    | 0.08   | 0.26    | 0.11    | 0.17 ± 0.11      | 0.18 ± 0.11      |
| Butane-2,3-diol             | 41.22   | 54.31   | 11.55   | 28.66   | 67.70   | 40.69 ± 28.38    | 25.80   | 39.27   | 57.67  | 30.94   | 34.60   | 37.66 ± 23.75    | 39.17 ± 25.76    |
| Octan-1-ol                  | 6.80    | 4.06    | 8.04    | 4.83    | 7.75    | 6.30 ± 2.53      | 10.29   | 4.96    | 6.11   | 9.71    | 7.40    | 7.70 ± 3.63      | 7.00 ± 3.16      |
| Propane-1,2-diol            | 1.67    | 1.22    | 0.96    | 0.57    | 1.97    | 1.28 ± 0.99      | 0.98    | 0.42    | 3.85   | 0.86    | 0.72    | 1.36 ± 2.04      | 1.32 ± 1.58      |

Table S2. Cont.

| Compound                           | Wine    |         |         |         |         | Mean            | R1 LAB  | R2 LAB  | R3 LAB  | R4 LAB | R5 LAB  | Mean            | Total mean      |
|------------------------------------|---------|---------|---------|---------|---------|-----------------|---------|---------|---------|--------|---------|-----------------|-----------------|
|                                    | R1      | R2      | R3      | R4      | R5      |                 |         |         |         |        |         |                 |                 |
| 2-(2-Ethoxyethoxy)- ethanol        | 4.85    | 9.59    | 4.02    | 1.72    | 2.42    | 4.52 ± 3.85     | 2.24    | 1.84    | 1.40    | 1.93   | 1.42    | 1.77 ± 0.51     | 3.14 ± 3.04     |
| Nonan-1-ol                         | 4.23    | 4.34    | 6.83    | 4.63    | 5.74    | 5.16 ± 2.08     | 4.52    | 2.77    | 2.94    | 5.08   | 2.88    | 3.64 ± 2.13     | 4.40 ± 2.21     |
| Decan-1-ol                         | 1.65    | 1.29    | 2.54    | 1.38    | 1.90    | 1.75 ± 0.93     | 2.25    | 1.44    | 1.57    | 2.28   | 1.37    | 1.78 ± 1.05     | 1.77 ± 0.97     |
| Phenylmethanol                     | 0.45    | 0.19    | 0.11    | 0.08    | 0.19    | 0.20 ± 0.15     | 0.10    | 0.12    | 0.08    | 0.07   | 0.18    | 0.11 ± 0.08     | 0.16 ± 0.12     |
| 2-Phenylethanol                    | 533.10  | 107.00  | 509.82  | 168.80  | 480.53  | 359.85 ± 218.36 | 399.50  | 390.77  | 327.89  | 436.47 | 373.40  | 385.61 ± 102.61 | 372.73 ± 168.15 |
| Dodecan-1-ol                       | 0.86    | 1.80    | 1.53    | 0.95    | 1.85    | 1.40 ± 0.69     | 1.12    | 2.90    | 1.07    | 1.81   | 0.72    | 1.53 ± 1.29     | 1.46 ± 1.02     |
| Hexadecan-1-ol                     | 0.35    | 0.34    | 0.46    | 0.15    | 0.86    | 0.43 ± 0.32     | 0.37    | 0.07    | 0.15    | 0.38   | 0.00    | 0.19 ± 0.19     | 0.31 ± 0.28     |
| Subtotal                           | 2662.36 | 1600.94 | 3177.65 | 1934.99 | 3273.99 |                 | 2395.28 | 2087.32 | 1333.15 | 2836.4 | 2438.46 |                 |                 |
| Proportions (%)                    | 87.78   | 80.24   | 84.42   | 81.54   | 85.11   |                 | 74.17   | 73.72   | 67.12   | 75.73  | 76.20   |                 |                 |
| <i>Aldehydes</i>                   |         |         |         |         |         |                 |         |         |         |        |         |                 |                 |
| Benzaldehyde                       | 1.32    | 3.02    | 4.37    | 2.05    | 4.32    | 3.02 ± 1.45     | 2.74    | 3.99    | 4.07    | 3.64   | 4.82    | 3.85 ± 0.94     | 3.43 ± 1.28     |
| 4-Methylbenzaldehyde               | 2.91    | 0.66    | 2.44    | 1.57    | 1.19    | 1.75 ± 0.88     | 0.90    | 0.52    | 0.71    | 0.53   | 0.45    | 0.62 ± 0.22     | 1.19 ± 0.85     |
| Subtotal                           | 4.23    | 3.68    | 6.81    | 3.62    | 5.51    |                 | 3.64    | 4.51    | 4.78    | 4.17   | 5.27    |                 |                 |
| Proportions (%)                    | 0.14    | 0.18    | 0.18    | 0.15    | 0.14    |                 | 0.11    | 0.16    | 0.24    | 0.11   | 0.16    |                 |                 |
| <i>Esters</i>                      |         |         |         |         |         |                 |         |         |         |        |         |                 |                 |
| Ethyl 3-methylbutanoate            | 0.69    | 0.00    | 0.93    | 0.19    | 1.60    | 0.68 ± 0.69     | 0.79    | 0.58    | 0.12    | 0.18   | 0.85    | 0.51 ± 0.36     | 0.59 ± 0.55     |
| Ethyl 2-hydroxypropanoate          | 35.08   | 45.94   | 55.89   | 49.15   | 39.84   | 45.18 ± 14.05   | 369.17  | 354.83  | 212.31  | 382.15 | 303.83  | 324.46 ± 99.21  | 184.82 ± 158.17 |
| Methyl octanoate                   | 0.10    | 0.19    | 0.05    | 0.14    | 0.00    | 0.10 ± 0.13     | 0.00    | 0.09    | 0.00    | 0.50   | 0.19    | 0.15 ± 0.30     | 0.12 ± 0.23     |
| Ethyl octanoate                    | 45.54   | 46.34   | 39.08   | 43.68   | 77.55   | 50.44 ± 25.15   | 48.96   | 44.10   | 70.27   | 62.62  | 64.28   | 58.05 ± 36.29   | 54.24 ± 30.92   |
| 2-Methylpropyl 2-hydroxypropanoate | 0.21    | 0.15    | 0.37    | 0.29    | 0.30    | 0.27 ± 0.09     | 1.63    | 1.11    | 1.04    | 2.09   | 2.09    | 1.59 ± 0.63     | 0.93 ± 0.81     |
| Ethyl nonanoate                    | 0.55    | 0.40    | 0.73    | 0.38    | 0.62    | 0.54 ± 0.34     | 0.16    | 0.41    | 0.47    | 0.47   | 0.41    | 0.38 ± 0.25     | 0.46 ± 0.30     |
| 3-Methylbutyl 2-hydroxypropanoate  | 1.61    | 1.38    | 1.90    | 1.89    | 1.67    | 1.69 ± 0.26     | 13.36   | 8.77    | 7.71    | 12.89  | 10.69   | 10.68 ± 2.69    | 6.19 ± 4.94     |
| Ethyl decanoate                    | 9.45    | 7.30    | 16.97   | 8.27    | 15.72   | 11.54 ± 9.84    | 7.95    | 8.08    | 8.75    | 10.77  | 7.71    | 8.65 ± 6.95     | 10.10 ± 8.50    |
| Ethyl benzoate                     | 0.07    | 0.00    | 0.19    | 0.00    | 0.10    | 0.07 ± 0.09     | 0.03    | 0.00    | 0.00    | 0.00   | 0.03    | 0.01 ± 0.03     | 0.04 ± 0.08     |
| Diethyl butanedioate               | 63.20   | 40.86   | 88.68   | 48.84   | 54.41   | 59.20 ± 18.04   | 61.37   | 41.18   | 50.47   | 43.06  | 42.43   | 47.70 ± 10.29   | 53.45 ± 15.57   |
| Ethyl 9-decenoate                  | 0.00    | 0.00    | 1.76    | 0.07    | 0.12    | 0.39 ± 0.94     | 0.12    | 0.00    | 1.01    | 0.00   | 0.07    | 0.24 ± 0.47     | 0.31 ± 0.73     |
| Methyl 2-hydroxy benzoate          | 0.11    | 0.10    | 0.15    | 0.13    | 0.14    | 0.13 ± 0.03     | 0.31    | 0.26    | 0.24    | 0.34   | 0.32    | 0.30 ± 0.08     | 0.21 ± 0.11     |
| Ethyl phenylacetate                | 1.68    | 1.39    | 1.63    | 1.59    | 2.05    | 1.67 ± 0.29     | 1.47    | 1.13    | 0.70    | 1.29   | 1.14    | 1.15 ± 0.35     | 1.41 ± 0.41     |

Table S2. Cont.

| Compound                                      | Wine   |        |        |        |        | Mean          | R1 LAB | R2 LAB | R3 LAB | R4 LAB | R5 LAB | Mean          | Total mean    |
|-----------------------------------------------|--------|--------|--------|--------|--------|---------------|--------|--------|--------|--------|--------|---------------|---------------|
|                                               | R1     | R2     | R3     | R4     | R5     |               |        |        |        |        |        |               |               |
| 2-Phenylethyl acetate                         | 3.42   | 2.79   | 0.00   | 0.00   | 4.62   | 2.17 ± 2.91   | 8.72   | 6.54   | 4.14   | 9.16   | 7.69   | 7.25 ± 2.45   | 4.71 ± 3.70   |
| Ethyl dodecanoate                             | 0.35   | 0.00   | 0.54   | 0.00   | 0.26   | 0.23 ± 0.50   | 0.00   | 0.00   | 0.22   | 0.32   | 0.16   | 0.14 ± 0.26   | 0.19 ± 0.40   |
| Ethyl 3-phenylpropanoate                      | 0.34   | 0.29   | 1.33   | 0.91   | 1.42   | 0.86 ± 0.53   | 0.46   | 0.31   | 0.73   | 1.04   | 1.05   | 0.72 ± 0.36   | 0.79 ± 0.45   |
| Diethyl-2-hydroxybutanedioate                 | 0.74   | 0.40   | 0.63   | 0.55   | 0.87   | 0.64 ± 0.27   | 0.00   | 0.00   | 0.00   | 0.00   | 0.00   | 0.00 ± 0.00   | 0.32 ± 0.38   |
| Methyl hexadecanoate                          | 0.00   | 0.14   | 0.10   | 0.00   | 0.16   | 0.08 ± 0.12   | 0.00   | 0.07   | 0.00   | 0.15   | 0.09   | 0.06 ± 0.14   | 0.07 ± 0.13   |
| Ethyl hexadecanoate                           | 0.83   | 0.23   | 0.73   | 0.53   | 0.48   | 0.56 ± 0.29   | 0.18   | 0.05   | 0.05   | 0.22   | 0.12   | 0.12 ± 0.10   | 0.34 ± 0.31   |
| Subtotal                                      | 163.97 | 147.90 | 211.66 | 156.61 | 201.93 |               | 514.68 | 467.51 | 358.23 | 527.25 | 443.15 |               |               |
| Proportions (%)                               | 5.41   | 7.41   | 5.62   | 6.60   | 5.25   |               | 15.94  | 16.51  | 18.03  | 14.08  | 13.85  |               |               |
| <b>Furan compounds</b>                        |        |        |        |        |        |               |        |        |        |        |        |               |               |
| Ethyl 2-furoate                               | 0.52   | 0.42   | 0.63   | 0.43   | 0.61   | 0.52 ± 0.12   | 0.41   | 0.34   | 0.27   | 0.40   | 0.36   | 0.36 ± 0.08   | 0.44 ± 0.13   |
| Dihydrofuran-2(3H)-one                        | 1.04   | 1.43   | 2.18   | 0.00   | 0.00   | 0.93 ± 1.44   | 5.16   | 0.00   | 4.71   | 5.39   | 5.62   | 4.18 ± 3.02   | 2.55 ± 2.85   |
| Subtotal                                      | 1.56   | 1.85   | 2.81   | 0.43   | 0.61   |               | 5.57   | 0.34   | 4.98   | 5.79   | 5.98   |               |               |
| Proportions (%)                               | 0.05   | 0.09   | 0.07   | 0.02   | 0.02   |               | 0.17   | 0.01   | 0.25   | 0.15   | 0.19   |               |               |
| <b>Ketones</b>                                |        |        |        |        |        |               |        |        |        |        |        |               |               |
| 4-Methyl-3-penten-2-one                       | 58.05  | 45.57  | 106.26 | 52.31  | 95.99  | 71.64 ± 38.22 | 80.16  | 57.28  | 55.50  | 87.73  | 73.57  | 70.85 ± 20.91 | 71.24 ± 30.28 |
| 3-Hydroxybutan-2-one                          | 0.28   | 0.22   | 0.39   | 0.30   | 0.47   | 0.33 ± 0.11   | 0.19   | 0.23   | 0.40   | 0.36   | 0.18   | 0.27 ± 0.14   | 0.30 ± 0.13   |
| Subtotal                                      | 58.33  | 45.79  | 106.65 | 52.61  | 96.46  |               | 80.35  | 57.51  | 55.90  | 88.09  | 73.75  |               |               |
| Proportions (%)                               | 1.92   | 2.30   | 2.83   | 2.22   | 2.51   |               | 2.49   | 2.03   | 2.81   | 2.35   | 2.30   |               |               |
| <b>Sulphur compounds</b>                      |        |        |        |        |        |               |        |        |        |        |        |               |               |
| 3-(Methylsulfanyl)propan-1-ol                 | 2.80   | 1.72   | 2.52   | 2.08   | 2.84   | 2.39 ± 0.54   | 3.11   | 1.51   | 1.85   | 1.57   | 1.99   | 2.01 ± 0.72   | 2.20 ± 0.65   |
| Subtotal                                      | 2.80   | 1.72   | 2.52   | 2.08   | 2.84   |               | 3.11   | 1.51   | 1.85   | 1.57   | 1.99   |               |               |
| Proportions (%)                               | 0.09   | 0.09   | 0.07   | 0.09   | 0.07   |               | 0.10   | 0.05   | 0.09   | 0.04   | 0.06   |               |               |
| <b>Terpenes</b>                               |        |        |        |        |        |               |        |        |        |        |        |               |               |
| (Z)-Linalool oxide                            | 0.00   | 33.28  | 0.00   | 0.00   | 0.00   | 6.66 ± 14.17  | 0.00   | 0.00   | 0.00   | 0.00   | 0.00   | 0.00 ± 0.00   | 3.33 ± 10.41  |
| 3,7-Dimethyl-1,6-octadien-3-ol (β-Linalol)    | 0.22   | 0.31   | 0.40   | 0.12   | 0.31   | 0.27 ± 0.36   | 0.32   | 0.32   | 0.00   | 0.00   | 0.13   | 0.15 ± 0.31   | 0.21 ± 0.34   |
| 3,7-Dimethyl-1,5,7-octatrien-3-ol (Hotrienol) | 0.00   | 0.00   | 0.00   | 0.00   | 0.00   | 0.00 ± 0.00   | 0.00   | 0.00   | 0.00   | 0.00   | 0.00   | 0.00 ± 0.00   | 0.00 ± 0.00   |

Table S2. Cont.

| Compound                                                                                      | Wine    |         |         |         |         |                  |         |         |         |         |         |                   |                  | Total mean |
|-----------------------------------------------------------------------------------------------|---------|---------|---------|---------|---------|------------------|---------|---------|---------|---------|---------|-------------------|------------------|------------|
|                                                                                               | R1      | R2      | R3      | R4      | R5      | Mean             | R1 LAB  | R2 LAB  | R3 LAB  | R4 LAB  | R5 LAB  | Mean              |                  |            |
| 3-Cyclohexene-1-methanol, alpha,alpha,4-trimethyl- ( $\alpha$ -Terpineol)                     | 0.46    | 0.54    | 0.65    | 0.12    | 0.39    | 0.43 $\pm$ 0.35  | 0.54    | 0.45    | 0.44    | 0.35    | 0.33    | 0.42 $\pm$ 0.19   | 0.43 $\pm$ 0.27  |            |
| 1,1,6-Trimethyl-1,2-dihydronaphthalene (TDN)                                                  | 0.49    | 0.19    | 1.13    | 1.09    | 0.68    | 0.72 $\pm$ 0.67  | 0.36    | 0.33    | 0.73    | 0.63    | 0.59    | 0.53 $\pm$ 0.34   | 0.62 $\pm$ 0.53  |            |
| ( <i>E</i> )-1-(2,6,6-trimethyl-1,3-cyclohexadien-1-yl)-2-buten-1-one ( $\beta$ -Damascenone) | 0.00    | 0.00    | 3.70    | 2.11    | 2.23    | 1.61 $\pm$ 1.84  | 1.05    | 0.67    | 0.00    | 0.00    | 0.00    | 0.34 $\pm$ 0.94   | 0.98 $\pm$ 1.57  |            |
| ( <i>E</i> )-6,10-dimethyl-5,9-Undecadien-2-one (Geranylacetone)                              | 8.13    | 21.65   | 0.00    | 0.00    | 10.90   | 8.14 $\pm$ 14.83 | 4.78    | 6.95    | 0.00    | 42.47   | 0.00    | 10.84 $\pm$ 24.31 | 9.49 $\pm$ 19.83 |            |
| ( <i>E,E</i> )-3,7,11-trimethyl-2,6,10-Dodecatrien-1-ol (( <i>E,E</i> )-Farnesol)             | 0.27    | 0.24    | 0.72    | 0.06    | 0.73    | 0.40 $\pm$ 0.33  | 0.43    | 0.41    | 0.04    | 1.24    | 0.18    | 0.46 $\pm$ 0.44   | 0.43 $\pm$ 0.38  |            |
| Subtotal                                                                                      | 9.57    | 56.21   | 6.60    | 3.50    | 15.24   |                  | 7.48    | 9.13    | 1.21    | 44.69   | 1.23    |                   |                  |            |
| Proportions (%)                                                                               | 0.32    | 2.82    | 0.18    | 0.15    | 0.40    |                  | 0.23    | 0.32    | 0.06    | 1.19    | 0.04    |                   |                  |            |
| Total                                                                                         | 3032.84 | 1995.10 | 3763.91 | 2373.13 | 3846.62 |                  | 3229.28 | 2831.34 | 1986.35 | 3745.47 | 3199.96 |                   |                  |            |

R1- R5 - Rondo wines, in which AF was induced using various yeast strains, and the wines were left to undergo spontaneous MLF; R1 LAB-R5 LAB - Rondo wines, in which AF was induced using various yeast strains (but the same strains as in R1-R5 wines), and MLF was carried out by inoculation with lactic acid bacteria



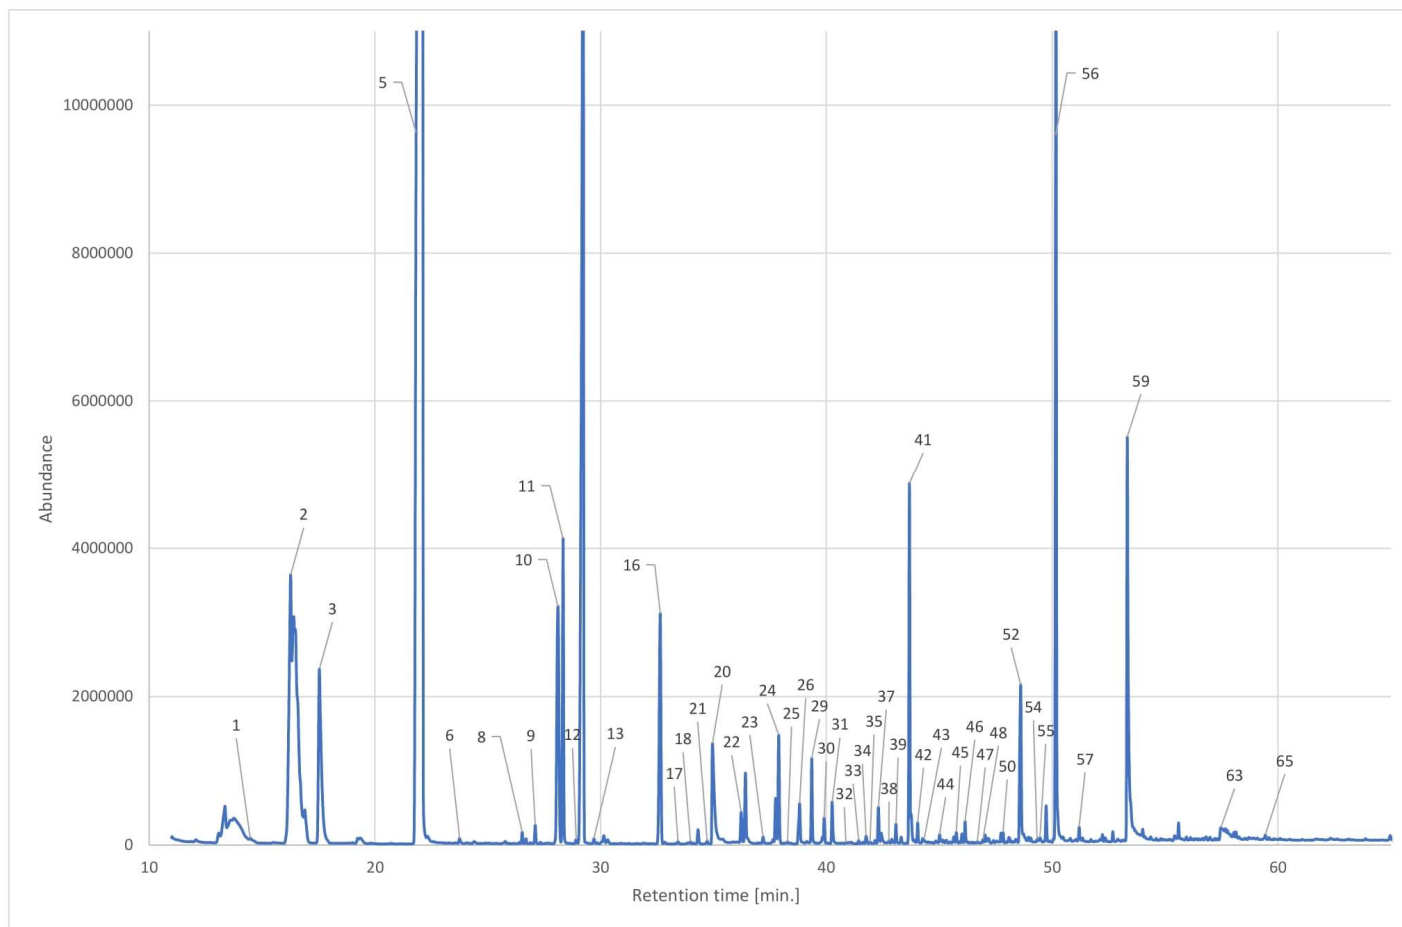

Figure S1. GC/MS chromatogram of volatile compounds of Zweigelt wine (see Table 1 for compound names).

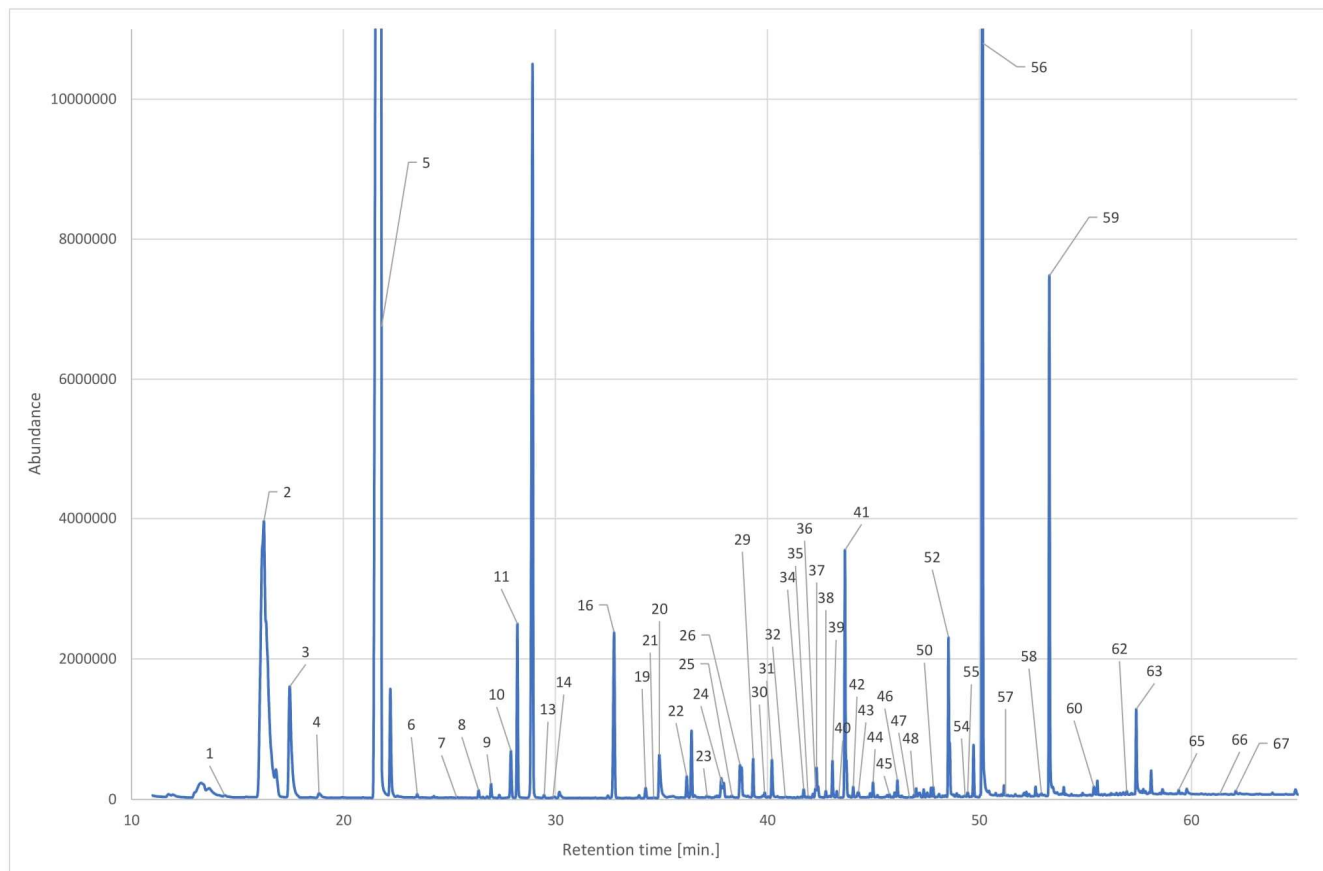

Figure S2. GC/MS chromatogram of volatile compounds of Rondo wine (see Table 1 for compound names).

Table S3. *p*-values obtained by the Mann-Whitney test when comparing Zweigelt and Rondo wines.

| Compound                    | <i>p</i> -value | Compound                           | <i>p</i> -value | Compound                                                                          | <i>p</i> -value |
|-----------------------------|-----------------|------------------------------------|-----------------|-----------------------------------------------------------------------------------|-----------------|
| <b>Acids</b>                |                 | Butane-2,3-diol                    | 0.00000005      | Methyl 2-hydroxybenzoate                                                          | 0.00463741      |
| Acetic acid                 | 0.01628537      | Octan-1-ol                         | 0.00000200      | Ethyl phenylacetate                                                               | 0.80727511      |
| Propanoic acid              | 0.85319729      | Propane-1,2-diol                   | 0.00014849      | 2-Phenylethyl acetate                                                             | 0.00006063      |
| 2-Methylpropanoic acid      | 0.90741272      | 2-(2-Ethoxyethoxy)- ethanol        | 0.10869076      | Ethyl dodecanoate                                                                 | 1.00000000      |
| Hexanoic acid               | 0.00000004      | Nonan-1-ol                         | 0.00205251      | Ethyl 3-phenylpropanoate                                                          | 0.97051607      |
| Octanoic Acid               | 0.00000200      | Decan-1-ol                         | 0.07244652      | Diethyl-2-hydroxybutanedioate                                                     | 0.10025063      |
| Nonanoic acid               | 0.02061967      | Phenylmethanol                     | 0.00001238      | Methyl hexadecanoate                                                              | 0.75895739      |
| Decanoic acid               | 0.31118841      | 2-Phenylethanol                    | 0.68432286      | Ethyl hexadecanoate                                                               | 0.01685781      |
| Benzoic acid                | 0.01693276      | Dodecan-1-ol                       | 0.83025542      | <b>Furan compounds</b>                                                            |                 |
| Dodecanoic acid             | 0.24539308      | Hexadecan-1-ol                     | 0.21656436      | Ethyl 2-furoate                                                                   | 0.33285542      |
| <b>Alcohols</b>             |                 | <b>Aldehydes</b>                   |                 | Dihydrofuran-2(3H)-one                                                            | 0.00204491      |
| 2-Methylpropan-1-ol         | 0.05010835      | Benzaldehyde                       | 0.03483315      | <b>Ketones</b>                                                                    |                 |
| Butan-1-ol                  | 0.74600910      | 4-Methylbenzaldehyde               | 0.00044598      | 4-Methyl-3-penten-2-one                                                           | 0.09923981      |
| 3-Methylbutan-1-ol          | 0.34026235      | <b>Esters</b>                      |                 | 3-Hydroxybutan-2-one                                                              | 0.03915697      |
| Pentan-1-ol                 | 0.00000267      | Ethyl 3-methylbutanoate            | 0.02255067      | <b>Sulphur compounds</b>                                                          |                 |
| 4-Methylpentan-1-ol         | 0.00000268      | Ethyl 2-hydroxypropanoate          | 0.75058409      | 3-(Methylsulfanyl)propan-1-ol                                                     | 0.00000000      |
| 3-Methylpentan-1-ol         | 0.00367114      | Methyl octanoate                   | 0.35846808      | <b>Terpenes</b>                                                                   |                 |
| Hexan-1-ol                  | 0.00000546      | Ethyl octanoate                    | 0.00303417      | (Z)-Linalool oxide                                                                | 0.00014867      |
| (E)-3-Hexen-1-ol            | 0.97005940      | 2-Methylpropyl 2-hydroxypropanoate | 0.94695598      | 3,7-Dimethyl-1,6-octadien-3-ol ( $\beta$ -Linalol)                                | 0.81956394      |
| 3-Ethoxypropan-1-ol         | 0.00262448      | Ethyl nonanoate                    | 0.01694934      | 3,7-Dimethyl-1,5,7-octatrien-3-ol Hotrienol                                       | 0.00000000      |
| (Z)-3-Hexen-1-ol            | 0.06667943      | 3-Methylbutyl 2-hydroxypropanoate  | 0.92344219      | 3-Cyclohexene-1-methanol, alpha,alpha,4-trimethyl- ( $\alpha$ -Terpineol)         | 0.55802517      |
| Octen-3-ol                  | 0.00000004      | Ethyl decanoate                    | 0.87663500      | 1,1,6-Trimethyl-1,2-dihydronaphthalene (TDN)                                      | 0.00105767      |
| Heptan-1-ol                 | 0.00002133      | Ethyl benzoate                     | 0.00013965      | (E)-1-(2,6,6-trimethyl-1,3-cyclohexadien-1-yl)-2-buten-1-one $\beta$ -Damascenone | 0.02244127      |
| 2-Ethylhexan-1-ol           | 0.22257380      | Diethyl butanedioate               | 0.00195285      | (E)-6,10-dimethyl-5,9-Undecadien-2-one (Geranylacetone)                           | 0.06024460      |
| 3-Ethyl-4-methylpentan-1-ol | 0.00000000      | Ethyl 9-decenoate                  | 0.00000160      | (E,E)-3,7,11-trimethyl-2,6,10-Dodecatrien-1-ol ((E,E)-Farnesol)                   | 0.58796458      |

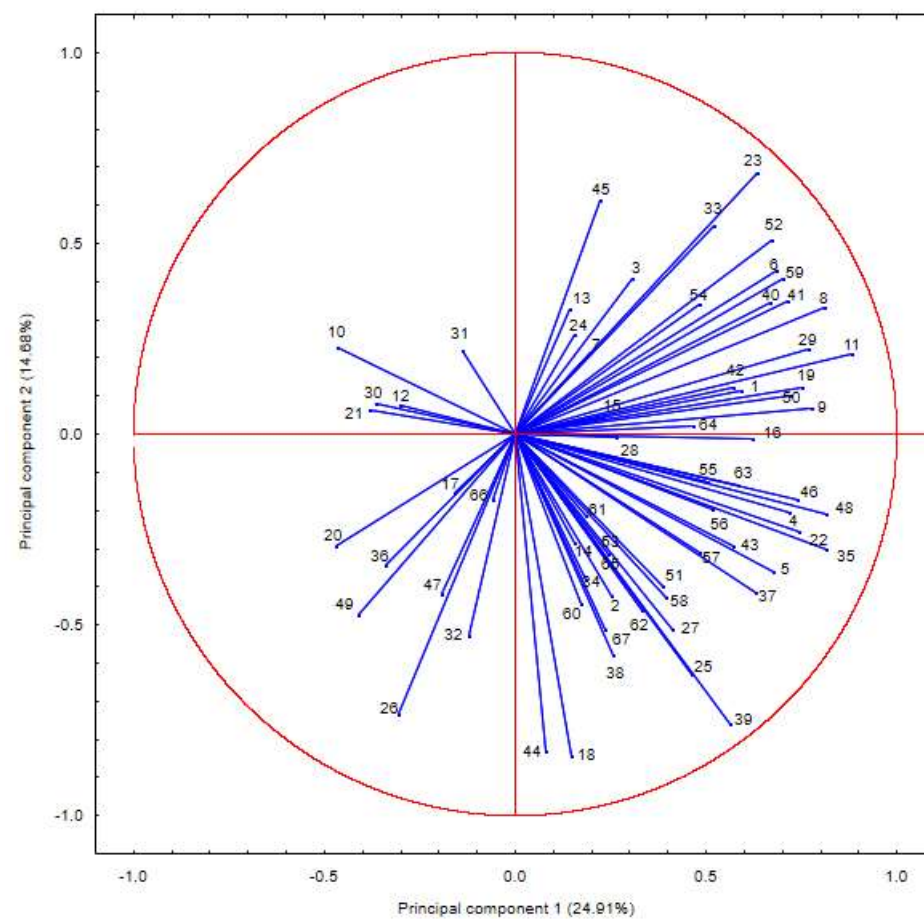

Figure S3. Projection of variables on the PCA plane defined by the first two principal components (numbers 1-67 stand for volatile compounds; see Table 1 for their names).
